# Supplementary material for: Characterization of the bZIP Transcription Factor Family in Pepper (Capsicum annuum L.): CabZIP25 Positively Modulates the Salt Tolerance
Source: Front Plant Sci. 2020 Feb 26;11:139. doi: 10.3389/fpls.2020.00139 (PMC7054902; doi:10.3389/fpls.2020.00139)
Supplement: Supplementary file 11 [file Table_3.xlsx]

## Sheet: S3
Supplementary Table S3 The conserved motifs identified from 60 CabZIP proteins
Motif	The width of the motif (aa)	E-value	The name of the query motif	Multilevel Consensus Sequence	No. of SlbZIP proteins in which motif is present	CabZIP proteins in which motif is present	Description in InterProScan
1	24	2.5E-660	IDEKRQKRMJSNRESARRSRMRKQ	XD[EP][KR][RK]Q[KR]R[ML][IL][SK]NRESA[RA]RSR[ME]RK[QK]	60	all CabZIPs	The basic-leucine zipper (bZIP) domain transcription factors [PMID: 7780801] of eukaryotic are proteins that contain a basic region mediating sequence-specific DNA-binding followed by a leucine zipper region required for dimerisation.
2	21	1.8e-280	AYLEELERKVERLQEENTELK	AYLXELERXVX[RT]LQEENXELK	56	all CabZIPs except CabZIP2,16,41,45
3	50	4.2e-192	NCLAHYDNLFRLKATAAKSDVFYLMSGMWKTPAERFFLWIGGFRPSELJK	[NG][CV][LV][ANS]HY[DF][NE][LI][FM][RN][LM]K[AG][DT][AL]AK[AS]DV[FL][HY]L[MV]SG[MT]W[KR][TS][PS][AV]ER[CF]F[LM]W[IM]G[GD]F[RK]PSEL[IL][KN]	8	CabZIP7,27,31,33,53,54,55,59	This entry represents a domain found in plant transcription factors, including TGA proteins and protein PERIANTHIA. In Arabidopsis thaliana, there are seven TGA paralogues (TGA 1-7), which are transcriptional activators that binds specifically to the DNA sequence 5'-TGACG-3' [PMID: 12953119, PMID: 12897257]. Another Arabidopsis thaliana protein in this entry, PERIANTHIA, binds to the 5'-AAGAAT-3'…
4	50	1.2e-198	FVRQADHLRQQTLQQMHRILTTRQAARGLLAIGEYFSRLRALSSLWLARP	F[VL][NR]QAD[HN]LR[QH][QE]T[LI][QH][QR][ML][HS][RQ]ILT[TV]RQ[AS]A[RQ][GCA][LF]L[AV][IFL]G[ED]Y[FL][HQS]RLRALSSLW[LA][AS]RP	9	CabZIP7,27,31,33,53,54,55,58,59	This entry represents a domain found in plant transcription factors, including TGA proteins and protein PERIANTHIA. In Arabidopsis thaliana, there are seven TGA paralogues (TGA 1-7), which are transcriptional activators that binds specifically to the DNA sequence 5'-TGACG-3' [PMID: 12953119, PMID: 12897257]. Another Arabidopsis thaliana protein in this entry, PERIANTHIA, binds to the 5'-AAGAAT-3'…
5	46	2.5e-134	ILVPQLEPLTEQQLVGICNLQQSCQQAEDALSQGMEKLQQSLAETI	[IV][LIV][MTV][PN][QH][LI][ED]PLT[ED]QQ[LVI]V[GEK][IV][CY]NL[QRT][QH][SC][CST]Q[QE]AEDAL[ST]QG[ML][EDV][KAQ]L[QHN]Q[SIT][LV][AS][DEQ][TA][IL]	10	CabZIP7, 27, 31, 33, 43, 53, 54, 55, 58, 59	TRANSCRIPTION FACTOR TGA2-RELATED (PTHR45693:SF12)
6	29	9.3e-75	TRJNRLTQQYLLVDAENSVLKAZJAELRQ	T[RK][LI]NX[LV]TQQ[YH][LH]L[VL]DA[EDQ]NSVL[KR][AE][EQ][LI]AELRQ	30	CabZIP3,4,5,8,11,12,13,19,20,21,23,24,26,29,30,32,34,35,36,37,38,39,41,42,43,44,45,48,51,60
7	21	4e-71	RGKTLGEMTLEDFLVKAGAVE	[RS][GQ]K[TN][FL]G[ES][MI][TN][LM][ED][DE][FL]L[VK][KR][AI][GW][AV][VA]E	12	CabZIP1,2,6,10,15,16,17,25,28,46,47,57
8	35	8.1e-40	GNISSGAAAFDMEYSRWLEEHHRLISELRNALNSH	[GS]N[IG]SS[GD]A[AL]AFDMEY[SA]RWLEEH[HQ][RK][LH][IM][CS][ED]LR[NS]A[LV]N[SE]H	9	CabZIP7,27,31,33,53,54,55,58,59
9	28	8.2e-40	LQRQGSLTLPRPLSQKTVDEVWRDIQKE	L[QH]RQ[GS]SLTL[PT]R[DPT]LS[QK]KTVDEVW[QR]D[IF]Q[KQ][EG]	8	CabZIP1,2,6,25,28,46,47,57	CAMP-RESPONSE ELEMENT BINDING PROTEIN-RELATED (PTHR22952)
10	21	1.5e-18	GGGPVTGPATNLNIGMDYWNA	[GHT][AG][GN][GP][VI][TAP][GMV]P[AT]TNLNIGMD[YLV]W[NG]A	5	CabZIP8,13,14,18,25
11	15	1.4e-17	LARQSSIYSLTLDEL	LARQ[SG]S[IL]YSLT[FL]DE[FLV]	6	CabZIP1,2,6,25,47,57
12	11	5.1e-19	SHRRSNSDSFA	[SGH]HRR[SA]NS[DE][ST][FI][AFL]	13	CabZIP23,29,30,34,35,36,37,38,39,45,49,51,60
13	26	3.1e-16	STYTQFVPSRRMGICDPLHQIGMWDD	[SH][THP][YT][TY]Q[FQ][VAP][AP][SNT][RKN][RH]M[GP][IT][CHY][DE]P[FILR][HIQ]Q[IMN][GS][MV][WV][DEG][DV]	5	CabZIP7,27,31,41,43
14	20	3.6e-17	PYPAVYPPAGVYAHPNMPMP	P[YL]PA[VL][YM][NPY]P[AW][GM][VD][YA][AT][HP]P[ENY]MP[KM][PT]	5	CabZIP9,14,18,42,56
15	28	2e-17	VHDDDDFLNPWNLLHVNQPIMASADMLY	[VHPY][HEIV][DGIQ][DGLP][DF][ADFGN][FLMQ][LIT][NE][PLS]W[NQ][LMY][LFMP][CHNY][VPS][NI]QPI[MT][AT][SA][AHS][DV][MALS][FLQ][YIMQ]	7	CabZIP5,11,19,24,37,44,48
16	50	1.1e-14	TAYGSPVPPPPPVTMLTLNSGPELHFFSSLNPLRKTSICLPKNISNNSTF	TAYGSPVPPPPPVTMLTLNSGPELHFFSSLNPLRKTSICLPKNISNNSTF	3	CabZIP15,16,17
17	18	6e-14	MEEVWKDINLSSLNDHTC	MEEVWKDINLSSL[NQ]DHT[CT]	3	CabZIP15,16,17
18	11	9e-14	RARQQGLYIGG	RAR[QS]QG[LFI][YFH][IV][GAL][GN]	10	CabZIP7,27,31,33,36,53,54,55,58,59
19	42	9.8e-12	GDGIIGRKSJSRIFVVVLIDSVKYVTYSCMLPFKGSIPLVTT	GDG[IM][IM]G[PR]KS[IL]SRIFVVVL[IM]DSVKYVTYSCMLPFKGS[IT]PLVTT	2	CabZIP9,56	TGACG-sequence-specific DNA-binding protein TGA-1B (Fragment)
20	27	4.1e-11	QQAQWSQHQJQQYQQQPPQHQHQQQQQ	[QNT]Q[AHIQ][QS][FWL][GPQRS][QHPS][HYQ][QD][ILH][HQP][QA][MFNY][QH]Q[QIPV][PQ][PQE][QH][HLPQ][QH][HP]Q[QHP]Q[QHN][QMP]	14	CabZIP2,6,23,25,29,33,34,35,36,37,45,47,55,57
